# Supplementary material for: Dopant-induced cationic bivalency in hierarchical antimony-doped tin oxide nano-particles for room-temperature SO2sensing
Source: Royal Society of Chemistry journal article supplement (doi:10.1039/d1ta03175a), 2021-01-01
Supplement: d1ta03175a1.pdf [file d1ta03175a1.pdf]

## Supplementary Information

### Dopant induced cationic bivalency in hierarchical antimony doped tin oxide nano-particles for room temperature SO<sub>2</sub> sensing

Nirman Chakraborty,<sup>1</sup> Pradeepta Kumar Ghose,<sup>2</sup> Pratyasha Rudra,<sup>1</sup> Sagnik Das,<sup>1</sup> Debdulal Saha,<sup>1</sup> Ajay K. Mishra,<sup>3</sup> Ambarish Sanyal<sup>1</sup> and Swastik Mondal<sup>1,\*</sup>

<sup>1</sup>Functional Materials and Devices Division, CSIR Central Glass and Ceramic Research Institute, 196, Raja S. C. Mullick Road, Jadavpur, Kolkata-700032, India

<sup>2</sup>School of Physical Sciences, Indian Association for the Cultivation of Science, Jadavpur, 2A and 2B Raja S.C. Mullick Road, Kolkata-700032, India

<sup>3</sup>High Pressure & Synchrotron Radiation Physics Division, Bhabha Atomic Research Centre, Trombay, Mumbai-400085, India

#### Sample preparation for ICP spectroscopy

For ICP spectroscopic studies, powder samples were initially dissolved in hot conc. HCl. The aim of performing ICP analysis of powder samples was to investigate the molar ratio of Sb:Sn since it was difficult to analyze composition from Rietveld refinement due to similar scattering factors of Sb<sup>3+</sup> and Sn<sup>4+</sup> ions. For sample preparation, 0.1 g of powder sample was dissolved completely in 20 cc HCl. The Sb:Sn ratio obtained was used to fix the composition during Rietveld refinement.

Table S1: Relative area under the deconvoluted XPS curves.

| Sample                                                 | tin                                                  | antimony                 | oxygen                  |
|--------------------------------------------------------|------------------------------------------------------|--------------------------|-------------------------|
| Sn <sub>0.957</sub> Sb <sub>0.043</sub> O <sub>2</sub> | Sn <sup>4+</sup> : 35637<br>Sn <sup>2+</sup> : 24510 | Sb <sup>3+</sup> : 15344 | O <sup>2-</sup> : 13321 |
| Sn <sub>0.856</sub> Sb <sub>0.144</sub> O <sub>2</sub> | Sn <sup>4+</sup> : 20585<br>Sn <sup>2+</sup> : 32991 | Sb <sup>3+</sup> : 25450 | O <sup>2-</sup> : 11737 |

Table S2: Value of Hall Coefficients for Sn<sub>0.856</sub>Sb<sub>0.144</sub>O<sub>2</sub> at different temperatures.

| Temperatures (°C) | Hall Coefficient (cm <sup>3</sup> coulomb <sup>-1</sup> ) |
|-------------------|-----------------------------------------------------------|
| 10                | -1.1880x10 <sup>-7</sup>                                  |
| 20                | -1.1797x10 <sup>-7</sup>                                  |
| 30                | -1.1786x10 <sup>-7</sup>                                  |
| 50                | -1.2015x10 <sup>-7</sup>                                  |
| 70                | -1.0318 x10 <sup>-7</sup>                                 |

Table S3: Particle size and interplanar distance calculated from TEM.

| Sample                                         | Particle size (nm) | Interplanar distance ( $\text{\AA}$ ) from TEM | (110) Interplanar distance ( $\text{\AA}$ ) from XRD |
|------------------------------------------------|--------------------|------------------------------------------------|------------------------------------------------------|
| $\text{Sn}_{0.936}\text{O}_2$                  | 18                 | 3.4069                                         | 3.4071                                               |
| $\text{Sn}_{0.957}\text{Sb}_{0.043}\text{O}_2$ | 14                 | 3.4266                                         | 3.4254                                               |
| $\text{Sn}_{0.856}\text{Sb}_{0.144}\text{O}_2$ | 17                 | 3.4140                                         | 3.4134                                               |

Table S4: Values of the topographical properties for pure and antimony doped tin oxide sensors.

| Sample                      | $\text{Sn}_{0.936}\text{O}_2$ | $\text{Sn}_{0.957}\text{Sb}_{0.043}\text{O}_2$ | $\text{Sn}_{0.856}\text{Sb}_{0.144}\text{O}_2$ |
|-----------------------------|-------------------------------|------------------------------------------------|------------------------------------------------|
| Arithmetic mean height (Sa) | 17.985 $\mu\text{m}$          | 27.752 $\mu\text{m}$                           | 20.828 $\mu\text{m}$                           |

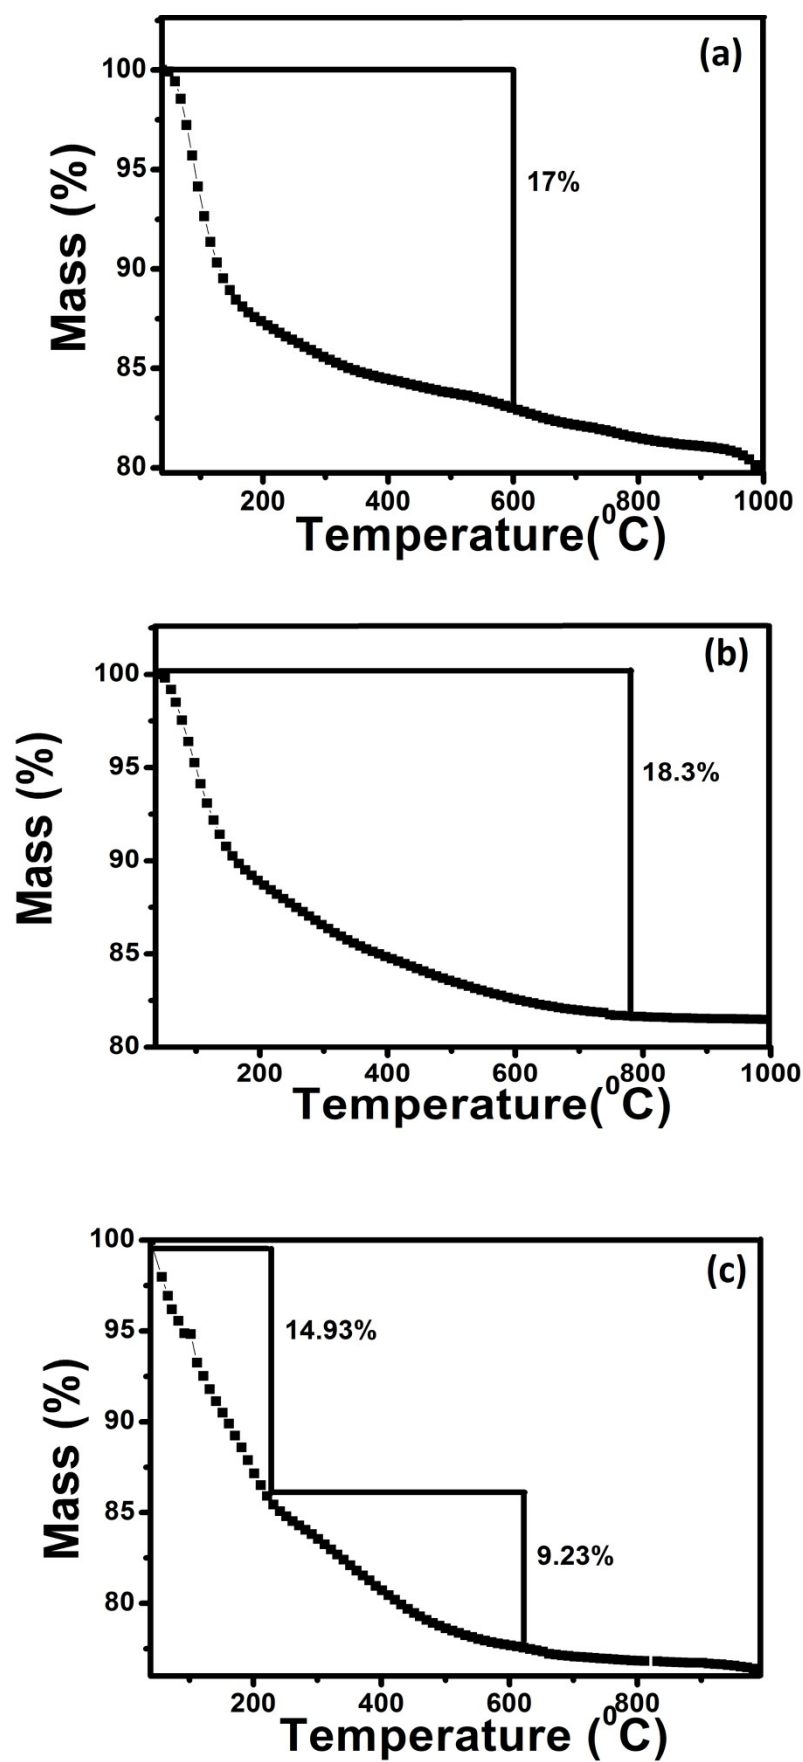

Fig S1: TGA plots of (a)  $\text{Sn}_{0.936}\text{O}_2$  (b)  $\text{Sn}_{0.957}\text{Sb}_{0.043}\text{O}_2$  and (c)  $\text{Sn}_{0.856}\text{Sb}_{0.144}\text{O}_2$  respectively

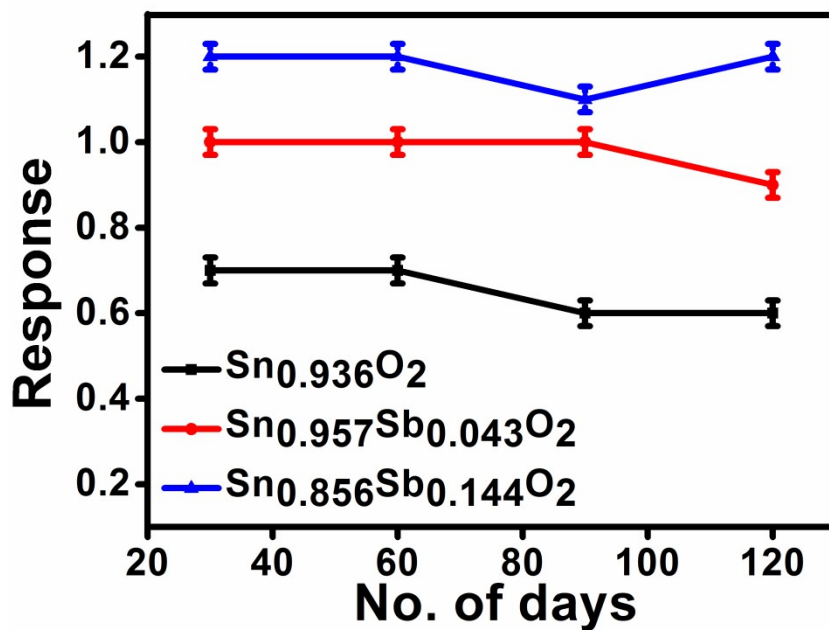

Fig S2: Stability analysis of the antimony doped tin oxide sensors for 120 days. The uncertainty is represented as error bars.

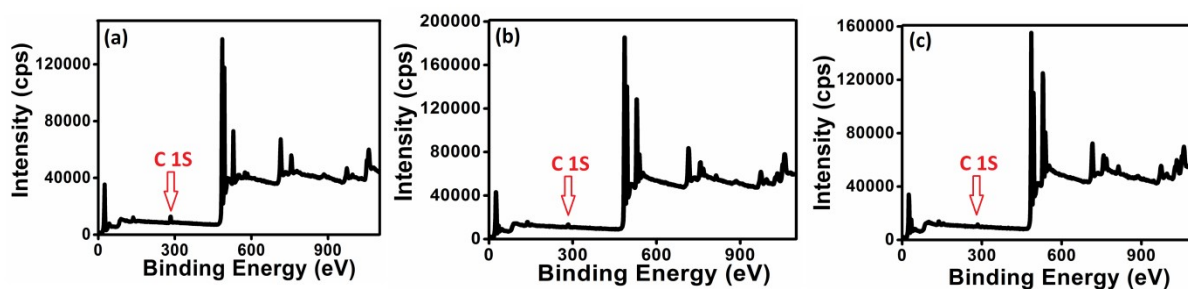

Fig S3: XPS survey scan of (a)  $\text{Sn}_{0.936}\text{O}_2$  (b)  $\text{Sn}_{0.957}\text{Sb}_{0.043}\text{O}_2$  and (c)  $\text{Sn}_{0.856}\text{Sb}_{0.144}\text{O}_2$ .

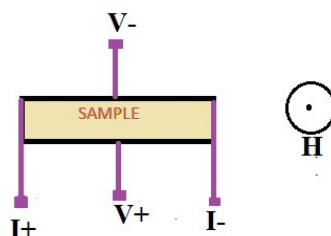

Fig S4: Experimental set-up for measurement of Hall Effect in  $\text{Sn}_{0.856}\text{Sb}_{0.144}\text{O}_2$ . V stands for voltage, I stands for current and H for magnetic field.

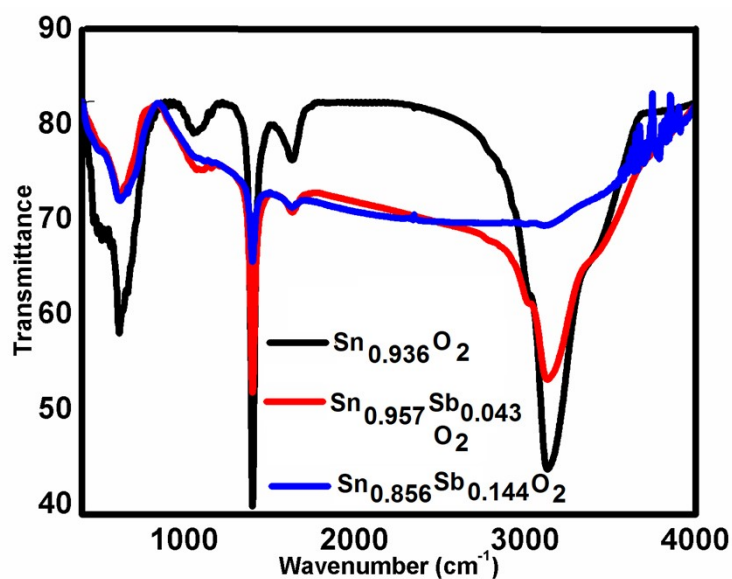

Fig S5: FTIR spectra of (a)  $\text{Sn}_{0.936}\text{O}_2$  (b)  $\text{Sn}_{0.957}\text{Sb}_{0.043}\text{O}_2$  and (c)  $\text{Sn}_{0.856}\text{Sb}_{0.144}\text{O}_2$  respectively.

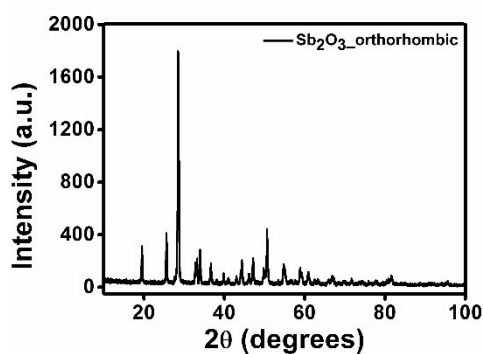

Fig S6: Powder X-ray diffraction pattern of  $\text{Sb}_2\text{O}_3$  (orthorhombic) phase material using  $\text{Cu K}_\alpha$  radiation source.

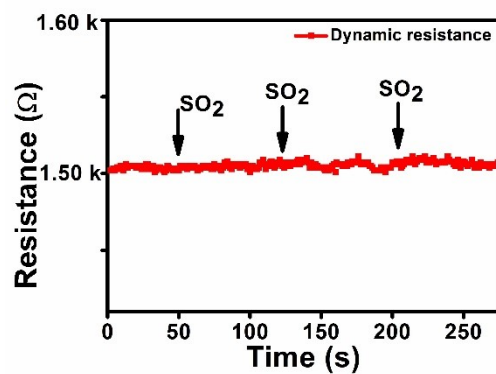

Fig S7: Insensitivity of  $\text{Sb}_2\text{O}_3$  (orthorhombic) sensor to pulses of  $\text{SO}_2$  gas (2 ppm).

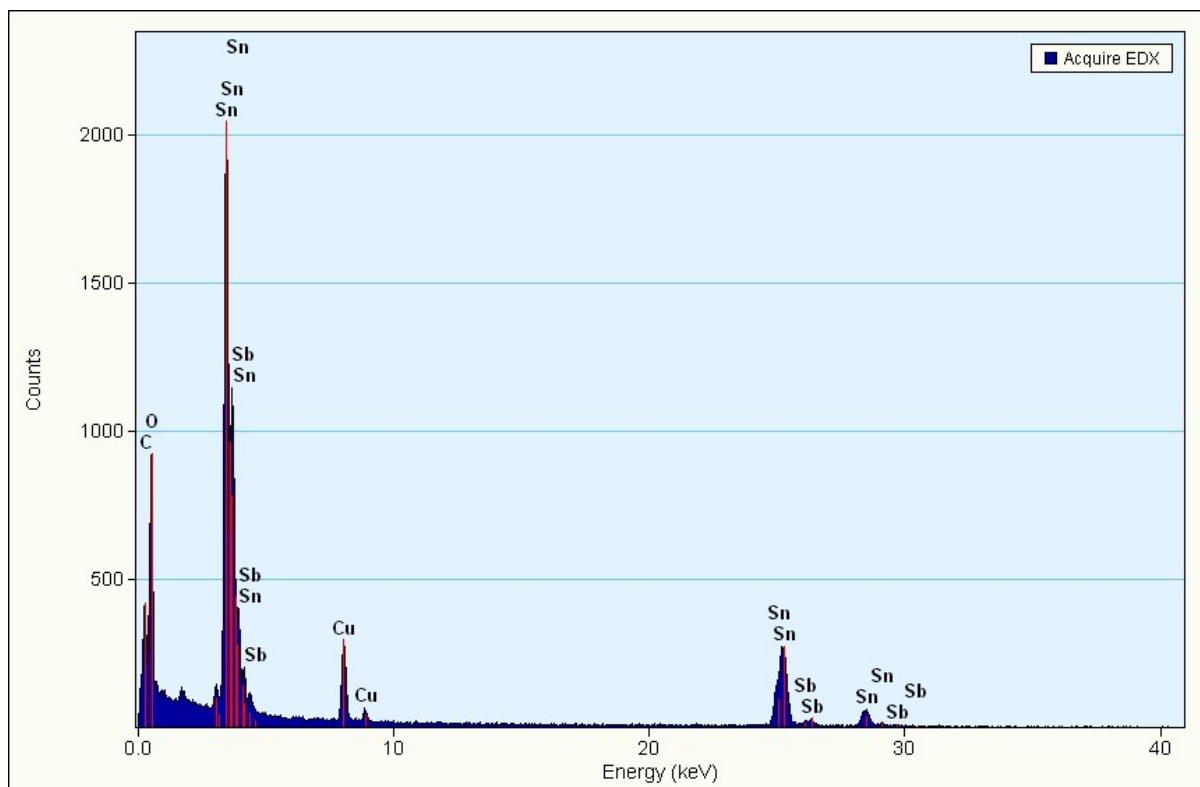

Fig S8: EDX spectrum of  $\text{Sn}_{0.957}\text{Sb}_{0.043}\text{O}_2$  sample. Signals of Cu and C are due to use of copper coated carbon grids during TEM.

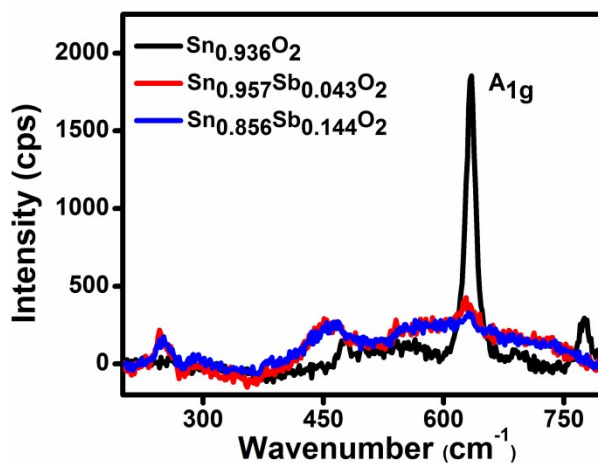

Fig S9: Room temperature Raman spectra of pure and antimony doped tin oxide samples. The shifting of A<sub>1g</sub> vibration mode (indicative of tin vibrations) towards lower wave number region in doped samples indicates doping of  $\text{Sn}^{4+}$  by a species of larger ionic radius like  $\text{Sb}^{3+}$  and elongation of Sn-O bond in doped samples.

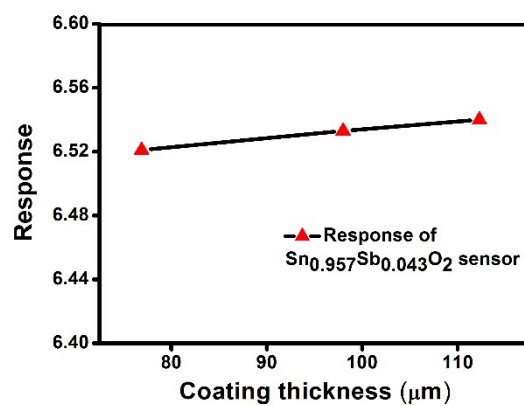

Fig S10: Plot of sensing response to 2 ppm SO<sub>2</sub> at room temperature vs. variation in sensor coating thickness for Sn<sub>0.957</sub>Sb<sub>0.043</sub>O<sub>2</sub> sample. Over a range of 70-120 μm, the response change is negligible.
